# Supplementary material
Source: PubMed Central journal article supplement (PMC5894342)
Supplement: NIHMS953195-supplement-Supp_Appendix.pdf [file NIHMS953195-supplement-Supp_Appendix.pdf]

**PERSONNEL**

Please complete this section in relation to how much each personnel works in pediatric oncology, including both inpatient and outpatient.

| Personnel                                              | # of personnel working full-time in pediatric oncology | Average yearly full time salary | # of personnel working part-time in pediatric oncology | Average part time FTE | Salary cost in pediatric oncology (full time salary X proportion of time in ped onc) |
|--------------------------------------------------------|--------------------------------------------------------|---------------------------------|--------------------------------------------------------|-----------------------|--------------------------------------------------------------------------------------|
| 1. Pediatric Oncologists                               |                                                        |                                 |                                                        |                       |                                                                                      |
| 2. General paediatricians/practitioners (Gen Paeds/GP) |                                                        |                                 |                                                        |                       |                                                                                      |
| 3. Nursing                                             |                                                        |                                 |                                                        |                       |                                                                                      |

**4. Resident/Trainee physicians**

| Type/level of trainee           | # working on average in pediatric oncology at any given time | % of time/responsibility dedicated to taking care of pediatric oncology patients | Average yearly salary |
|---------------------------------|--------------------------------------------------------------|----------------------------------------------------------------------------------|-----------------------|
| <i>insert rows as necessary</i> |                                                              |                                                                                  |                       |
|                                 |                                                              |                                                                                  |                       |
|                                 |                                                              |                                                                                  |                       |

**5. Pharmacy**

| # of full time oncology dedicated personnel | Average yearly full time salary | # of personnel workin part time in pediatric oncology | Average part time FTE | Salary cost in ped on (full-time salary X proportion of time in ped onc) |
|---------------------------------------------|---------------------------------|-------------------------------------------------------|-----------------------|--------------------------------------------------------------------------|
|                                             |                                 |                                                       |                       |                                                                          |

| Number of non-dedicated pharmacists in central pharmacy in an average day | Yearly average salary of non-dedicated pharmacist in central pharmacy | % of time pharmacist spends on medications for pediatric oncology patients |
|---------------------------------------------------------------------------|-----------------------------------------------------------------------|----------------------------------------------------------------------------|
|                                                                           |                                                                       |                                                                            |

**7. Surgeons**

| Type                 | Number of personnel | Average yearly salary | Average percentage of time spent on pediatric oncology cases<br><i>*Note this will require obtaining and reviewing OR lists for the hospital for 4 randomly chosen weeks in the last calendar year and calculating the percentage of cases for each personnel that were on pediatric oncology patients</i> |
|----------------------|---------------------|-----------------------|------------------------------------------------------------------------------------------------------------------------------------------------------------------------------------------------------------------------------------------------------------------------------------------------------------|
| General surgeons     |                     |                       |                                                                                                                                                                                                                                                                                                            |
| Orthopaedic surgeons |                     |                       |                                                                                                                                                                                                                                                                                                            |
| Neurosurgeons        |                     |                       |                                                                                                                                                                                                                                                                                                            |

**ANCILLARY SERVICES**

**1. Diagnostic Imaging**

For the following questions, determine number of Xrays, US, CT, and MRIs performed on pediatric oncology patients for four randomly chosen weeks in the last calendar year.

| Diagnostic imaging | Quantity | Charge per unit |
|--------------------|----------|-----------------|
| X-Ray              |          |                 |
| US                 |          |                 |
| CT                 |          |                 |
| MRI                |          |                 |

**2. Radiation**

For four randomly chosen weeks in the last calendar year, determine all radiation administered for pediatric oncology patients and the charge for each.

| Radiation Service               | Quantity | Charge per unit |
|---------------------------------|----------|-----------------|
| <i>insert rows as necessary</i> |          |                 |
|                                 |          |                 |
|                                 |          |                 |

**3. Pathology**

For four randomly chosen weeks in the last calendar year, determine all pathology samples sent for pediatric oncology patients and the charge for each.

| Pathology Service               | Quantity | Charge per unit |
|---------------------------------|----------|-----------------|
| <i>insert rows as necessary</i> |          |                 |
|                                 |          |                 |
|                                 |          |                 |

**4. Laboratory**

For two weeks prospectively, document all blood laboratory tests sent on pediatric oncology patients, including both outpatient and inpatient. Obtain price charged to the patient for each type of test sent.

| Blood laboratory test           | Quantity | Charge per unit |
|---------------------------------|----------|-----------------|
| <i>insert rows as necessary</i> |          |                 |
|                                 |          |                 |
|                                 |          |                 |

**5. Blood bank**

For two weeks prospectively, document all blood products ordered and administered to pediatric patients, either outpatient or inpatient. Obtain price charged for each type of blood product

| Blood product                   | Quantity | Charge per unit |
|---------------------------------|----------|-----------------|
| <i>insert rows as necessary</i> |          |                 |
|                                 |          |                 |
|                                 |          |                 |

**BEDS and ROOM and BOARD**

**1. Inpatient Unit**

| Question                                                                           | Response |
|------------------------------------------------------------------------------------|----------|
| Average daily occupancy of hospital beds (non-ICU) by pediatric oncology patients: |          |
| Daily bedspace charge for general ward beds:                                       |          |

**2. ICU**

| Question                                                            | Response |
|---------------------------------------------------------------------|----------|
| Average daily occupancy of ICU beds by pediatric oncology patients: |          |
| Daily bedspace charge for ICU beds:                                 |          |

**3. Operating room**

For four randomly chosen weeks in the last calendar year, determine number of hours of operating theatre taken up by pediatric oncology patients, separating into major vs. minor surgeries

| Total hours                                                                                                                                       |                                                                                                       |
|---------------------------------------------------------------------------------------------------------------------------------------------------|-------------------------------------------------------------------------------------------------------|
| Major surgeries<br><i>E.g. thoracotomies, requiring &gt;1hr in the OR, extensive resection/thoracotomy, any cardiopulmonary or CNS procedure.</i> | Minor surgeries<br><i>E.g. day surgeries (i.e., line placement, superficial lymph node resection)</i> |
|                                                                                                                                                   |                                                                                                       |

#### 4. Accommodation

| Question                                                                                                                                                                              | Response                               |
|---------------------------------------------------------------------------------------------------------------------------------------------------------------------------------------|----------------------------------------|
| Is accommodation close to the hospital provided for families of pediatric oncology patients?                                                                                          |                                        |
| If yes, is this provided free or at cost?                                                                                                                                             |                                        |
| If free, who is the funder?                                                                                                                                                           |                                        |
| What is the annual budget for this service?                                                                                                                                           |                                        |
| If annual budget is not available then please obtain daily average number of accommodation beds taken up by family members of pediatric oncology patients and the charge for one day. | Number of beds:<br>Charge for one day: |

#### 5. Food

| Question                                                                                                                                                                       | Response                                 |
|--------------------------------------------------------------------------------------------------------------------------------------------------------------------------------|------------------------------------------|
| Is food provided to families of pediatric oncology patients?                                                                                                                   |                                          |
| If yes, is this provided free or at cost?                                                                                                                                      |                                          |
| If free, who is the funder?                                                                                                                                                    |                                          |
| What is the annual budget for this service?                                                                                                                                    |                                          |
| If annual budget is not available then please obtain average daily number of meals taken up by family members of pediatric oncology patients and the charge for one such meal. | Number of meals:<br>Charge for one meal: |

### MEDICATIONS

#### 1. Chemotherapy

For two weeks prospectively, document all chemotherapy (type and dose) provided to pediatric oncology patients, either outpatient or inpatient. Document charge of each medication

| Type                         | Dose | Charge per unit |
|------------------------------|------|-----------------|
| <i>Insert rows as needed</i> |      |                 |
|                              |      |                 |
|                              |      |                 |

#### 2. Supportive care medications

For two weeks prospectively, document all non-chemotherapy medications provided to pediatric oncology patients, either outpatient or inpatient. Document charge of each medication

| Non-chemotherapy medications | Charge per unit |
|------------------------------|-----------------|
| <i>Insert rows as needed</i> |                 |
|                              |                 |
|                              |                 |

### OUTPATIENT CLINIC

| Question                                                                                | Response |
|-----------------------------------------------------------------------------------------|----------|
| Number of pediatric oncology patients seen in an average month in the outpatient clinic |          |
| Number of overall patients seen in an average month in the outpatient clinic            |          |
| Outpatient clinic annual budget (excluding salary costs of nursing, physicians, etc...) |          |

### SURVIVAL STATISTICS

| Question                                                                                         | Response |
|--------------------------------------------------------------------------------------------------|----------|
| Number of new pediatric oncology diagnoses made annually                                         |          |
| Percentage of pediatric oncology patients seen at hospital who survive their diagnosis >=5 years |          |
